# Supplementary material
Source: HighWire-hosted journal article supplement (https://tsaco.bmj.com/content/3/1/e000174)
Supplement: inline-supplementary-material-1 [file inline-supplementary-material-1.docx]

**Appendix A. ICD-9 Codes**

Cervical Spine Fractures: 805, 805.00-08, 805.10-18

Cervical Spinal Cord Injury: 806.00-19

Cervical Spine Surgery: 810, 840.0, 810.1-3, 813, 813.0-3, 816, 816.2-6

Halo Application: 02.94, 02.95

Obesity: 278.0, 278.00-02, V85.30-39, V85.41-45

Dysphagia: 787.2, 787.20-4, 787.29

Gastrostomy: 43.1, 43.11, 43.19

Tracheostomy: 31.1, 31.2, 31.29

Dementia: 290, 290.0, 290.1, 290.10-13, 290.2, 290.20, 290.21, 290.3, 290.4, 290.40-2, 290.3, 290.8, 290.9, 291.2, 292.82, 294.1, 294.10, 294.11, 294.2, 294.20, 294.21

TBI: 801.1, 801.10-16, 801.19, 801.2, 801.20-26, 801.29, 801.3, 801.30-36, 801.39, 801.4, 801.40-46, 801.49, 801.6, 801.60-66, 801.69, 801.7, 801.70-76, 801.79, 801.8, 801.80-86, 801.89, 801.9, 801.90-96, 801.99, 800.1, 800.10-16, 800.19, 800.2, 800.20-26, 800.29, 800.3, 800.30-36, 800.39, 800.4, 800.40-46, 800.49, 800.6, 800.60-66, 800.69, 800.7, 800.70-76, 800.79, 800.8, 800.80-86, 800.89, 800.9, 800.90-96, 800.99, 803.1, 803.10-16, 803.19, 803.2, 803.20-26, 803.29, 803.3, 803.30-36, 803.39, 803.4, 803.40-46, 803.49, 803.6, 803.60-66, 803.69, 803.7, 803.70-76, 803.79, 803.8, 803.80-86, 803.89, 803.9, 803.90-96, 803.99, 804.1, 804.10-16, 804.19, 804.2, 804.20-26, 804.29, 804.3, 804.30-36, 804.39, 804.4, 804.40-46, 804.49, 804.6, 804.60-66, 804.69, 804.7, 804.70-76, 804.79, 804.8, 804.80-86, 804.89, 804.9, 804.90-96, 804.99, 851, 851.0, 851.00-06, 851.03, 851.1, 851.10-16, 851.19, 851.2, 851.20-26, 851.29, 851.3, 851.30-36, 851.39, 851.4, 851.40-46, 851.49, 851.5, 851.50-56, 851.59, 851.6, 851.60-66, 851.69, 851.7, 851.70-76, 851.79, 851.8, 851.80-86, 851.89, 851.9, 851.90-96, 851.99, 852, 852.0, 852.00-06, 852.09, 852.1, 852.10-16, 852.19, 852.2, 852.20-26, 852.29, 852.3, 852.30-36, 852.39, 852.4, 852.40-46, 852.49, 852.5, 852.50-56, 852.59, 853, 853.0, 853.00-06, 853.09, 853.1, 853.10-16, 853.19, 854, 854.0, 854.00-06, 854.09, 854.1, 854.10-16, 854.19

All Traumatic Injury Diagnosis Codes: 800-959.99

Myocardial Infarction: 410, 410.0, 410.00-2, 410.1, 410.10-12, 410.2, 410.21-2, 410.3, 410.30-2, 410.4, 410.40-2, 410.5, 410.50-2, 410.6, 410.60-2, 410.7, 410.70-2, 410.8, 410.80-2, 410.9, 410.90-2, 412

Venous Thromboembolism: 415.1, 415.11, 415.13, 415.19, 453.2-4, 453.8, 453.9

Any Pneumonia: 480, 480.0-3, 480.8, 480.9, 487.0, 488.01, 488.11, 488.81, 481, 482, 482.0-3, 482.3, 482.30-2, 482.39, 482.4, 482.40-2, 482.9, 482.8, 482.81-4, 482.89, 482.9, 485, 486, 483, 483.0, 483.1, 483.8, 484.1, 484.3, 484.5-8, 507.0, 997.32, 997.31

Mechanisms of injury E-codes

Penetrating Trauma: 955, 955.0-4, 955.6-7, 955.9, 965, 965.0-4, 968.6, 922.0-1, 922.3-5, 922.8-9, 928.7, 970, 985, 985.0-4, 985.6-7, 956, 966, 9203, 920.8-9, 974, 986, 920.0-2, 920.4-5, 920.8-9

Motor Vehicle Accident: 810-819.9

Pedicycle Accident: 826, 826.1-4, 826.8-9

Pedestrian versus Auto: 829.0

Same Level Falls: 885, 885.0-4, 885.9, 886, 886.0, 886.9, 888.0-1, 888.8-9

Fall From Height: 880, 880.0, 880.9, 881, 881.0-1, 882, 884, 884.0-6, 884.9, 883, 883.0-2, 883.9
